# Supplementary material for: Regional assessment and uncertainty analysis of carbon and nitrogen balances at cropland scale using the ecosystem model LandscapeDNDC
Source: Copernicus journal article supplement (doi:10.5194/bg-21-1563-2024), 2024-03-27
Supplement: Supplementary file 1 [file bg-21-1563-2024-supplement.pdf]

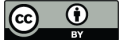

*Supplement of*

## **Regional assessment and uncertainty analysis of carbon and nitrogen balances at cropland scale using the ecosystem model LandscapeDNDC**

**Odysseas Sifounakis et al.**

*Correspondence to:* Edwin Haas ([edwin.haas@kit.edu](mailto:edwin.haas@kit.edu))

The copyright of individual parts of the supplement might differ from the article licence.

1 S1. Supplementary Material

2 S1.1 Material and Methods

3 **Sensitivity Index**

4 In the first step, the Sensitivity Index algorithm (SI) (Pannell, 1997) was calculated for all  
5 process parameters by splitting the parameter ranges into 10 equidistant values from minimum  
6 to maximum and by rating SI values:

7 
$$SI = \frac{CUM_{max} - CUM_{min}}{CUM_{max}}$$

8 where  $CUM_{max}$  and  $CUM_{min}$  are the maximum and minimum cumulative results of 10  
9 simulations. High SI values explain a high sensitivity of the underlying parameter with respect  
10 to the model results, whereas low values or even zero indicate low or no sensitivity.

11

12 S1.2 Results

13 *Table S 1. Observed yield rates in the region of Thessaly. Cotton yields are the cotton bolls, clover feed is the total*  
14 *harvested above ground biomass, for wheat and barley it is the grain yield, maize is accounted grain ear and the*  
15 *stems Source ELSTAT.*

| Crop Yields [tons dry matter ha <sup>-1</sup> ] |      |      |      |      |      |      |
|-------------------------------------------------|------|------|------|------|------|------|
| Crops                                           | 2012 | 2013 | 2014 | 2015 | 2016 | Mean |
| Cotton                                          | 2.7  | 3.6  | 3.5  | 3.4  | 3.3  | 3.3  |
| Clover                                          | 8.6  | 8.9  | 8.7  | 7.9  | 7.7  | 8.4  |
| Wheat                                           | 3.3  | 3.3  | 3.3  | 3.7  | 3.6  | 3.4  |
| Barley                                          | 3.2  | 3.2  | 3.2  | 3.5  | 3.5  | 3.3  |
| Maize                                           | 10.9 | 12.1 | 12.3 | 12.7 | 12.1 | 12.0 |

16

17 *Table S 2. Crop rotation scenarios (R1 – R5) for the region of Thessaly where the crop abbreviations corn, wiwh,*  
18 *perg, cott, and wbar refer to maize, winter wheat, clover (legume feed crops s.a. alfalfa or vetch), cotton and winter*  
19 *barley respectively.*

| years | R1   | R2   | R3   | R4   | R5   |
|-------|------|------|------|------|------|
| 2010  | corn | wiwh | perg | cott | wbar |
| 2011  | wiwh | perg | cott | wbar | corn |
| 2012  | perg | cott | wbar | corn | wiwh |
| 2013  | cott | wbar | corn | wiwh | perg |

|      |      |      |      |      |      |
|------|------|------|------|------|------|
| 2014 | wbar | corn | wiwh | perg | cott |
| 2015 | corn | wiwh | perg | cott | wbar |
| 2016 | wiwh | perg | cott | wbar | corn |

20

21 *Table S 3. Carbon Balance (totals) Summary of the Assessment and Uncertainty Analysis of the of cropland*  
 22 *cultivation of the region of Thessaly, Greece, GPP gross primary productivity, TER terrestrial ecosystem respiration,*  
 23 *Biomass export includes all C in yield, straw and feed exported from the fields, 360000 ha cropland.*

|                | Mean                            | Std                             | Median                          | Q25                             | Q75                             |
|----------------|---------------------------------|---------------------------------|---------------------------------|---------------------------------|---------------------------------|
|                | [mio. tons C yr <sup>-1</sup> ] |
| C-Inputs       | 4.51                            | 0.20                            | 4.45                            | 4.36                            | 4.69                            |
| C-Outputs      | 4.32                            | 0.17                            | 4.31                            | 4.19                            | 4.45                            |
| SOC-changes    | 0.19                            | 0.11                            | 0.20                            | 0.14                            | 0.27                            |
| Input fluxes   |                                 |                                 |                                 |                                 |                                 |
| GPP            | 4.25                            | 0.20                            | 4.21                            | 4.11                            | 4.42                            |
| C in manure    | 0.25                            | 0.01                            | 0.26                            | 0.25                            | 0.26                            |
| Output fluxes  |                                 |                                 |                                 |                                 |                                 |
| TER            | 3.08                            | 0.16                            | 3.06                            | 2.97                            | 3.20                            |
| Biomass export | 1.24                            | 0.05                            | 1.24                            | 1.21                            | 1.27                            |

24

25 *Table S 4 Nitrogen balance (totals) Summary of the Assessment and Uncertainty Analysis of the total Nitrogen*  
 26 *Balance of cropland cultivation of the region of Thessaly, Greece.*

|                         | Mean                     | Std                      | Median                   | Q25                      | Q75                      |
|-------------------------|--------------------------|--------------------------|--------------------------|--------------------------|--------------------------|
|                         | [kt-N yr <sup>-1</sup> ] |
| N-Inputs                | 76.5                     | 3.2                      | 77.8                     | 73.3                     | 79.1                     |
| N-Outputs               | 71.7                     | 3.2                      | 71.2                     | 69.4                     | 73.7                     |
| N-stock-changes         | 4.8                      | 0.0                      | 6.6                      | 3.9                      | 5.4                      |
| Input fluxes            |                          |                          |                          |                          |                          |
| N deposition            | 2.0                      | 0.3                      | 2.1                      | 1.9                      | 2.1                      |
| Bio. N fixation         | 16.7                     | 1.6                      | 16.7                     | 15.9                     | 17.5                     |
| N in min. fertilizer    | 28.9                     | 1.7                      | 29.3                     | 27.6                     | 29.8                     |
| N in organic fertilizer | 28.9                     | 1.3                      | 29.2                     | 27.9                     | 29.8                     |

|                                 |      |     |      |      |      |
|---------------------------------|------|-----|------|------|------|
|                                 |      |     |      |      |      |
| Output fluxes                   |      |     |      |      |      |
| Gaseous emissions <sup>1)</sup> | 21.2 | 3.1 | 21.1 | 18.9 | 23.4 |
| N <sub>2</sub> O                | 0.9  | 0.3 | 0.9  | 0.7  | 1.1  |
| NO                              | 1.1  | 0.5 | 1.0  | 0.7  | 1.4  |
| N <sub>2</sub>                  | 4.9  | 2.4 | 4.5  | 2.9  | 6.6  |
| NH <sub>3</sub>                 | 14.3 | 2.6 | 13.5 | 12.5 | 15.6 |
| Aquatic fluxes <sup>2)</sup>    |      |     |      |      |      |
| NO <sub>3</sub> leaching        | 3.9  | 1.3 | 3.8  | 3.0  | 4.7  |
|                                 |      |     |      |      |      |

27 1) Gaseous emissions are the sum of N<sub>2</sub>O, NO, N<sub>2</sub> and NH<sub>3</sub> fluxes; 2) Aquatic flux is nitrate leaching (NO<sub>3</sub>)

28

29 Table S 5. Total crop yields per cultivar and year.

| Crop Yields [tons dry matter] |           |           |           |           |           |           |
|-------------------------------|-----------|-----------|-----------|-----------|-----------|-----------|
| Crops                         | 2012      | 2013      | 2014      | 2015      | 2016      | Mean      |
| Cotton                        | 303 676.9 | 374 424.6 | 359 806.7 | 322 292.0 | 285 780.3 | 329 196.1 |
| Clover                        | 302 753.2 | 319 401.7 | 338 134.6 | 341 938.4 | 360 693.9 | 332 584.4 |
| Wheat                         | 477 700.7 | 461 875.5 | 395 902.1 | 430 014.4 | 450 254.3 | 443 149.4 |
| Barley                        | 84 520.8  | 99 091.8  | 139 402.9 | 139 990.8 | 102 454.7 | 113 092.2 |
| Maize                         | 332 531.6 | 431 324.6 | 377 783.9 | 351 285.4 | 334 277.7 | 365 440.6 |

30

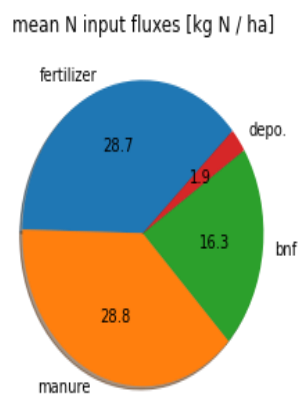

31

32 Figure S 1. Shares of components of the annual nitrogen in- and output fluxes.

33

34

35

36 *Table S 6. Simulated crop yields per cultivar and year for the irrigated land.*

| Crop Yields [tons dry matter ha <sup>-1</sup> ] |        |      |     |
|-------------------------------------------------|--------|------|-----|
| Crops                                           | Median | Mean | STD |
| Cotton                                          | 4.0    | 3.7  | 0.9 |
| Clover                                          | 9.8    | 9.6  | 0.6 |
| Wheat                                           | 3.9    | 3.6  | 0.9 |
| Barley                                          | 5.3    | 5.0  | 1.2 |
| Maize                                           | 10.9   | 10.6 | 1.3 |

37

38 *Table S 7. Simulated crop yields per cultivar and year for the rain feed land.*

| Crop Yields [tons dry matter ha <sup>-1</sup> ] |        |      |     |
|-------------------------------------------------|--------|------|-----|
| Crops                                           | Median | Mean | STD |
| Cotton                                          | 3.0    | 2.9  | 0.7 |
| Clover                                          | 9.8    | 9.6  | 0.6 |
| Wheat                                           | 3.9    | 3.6  | 0.9 |
| Barley                                          | 4.0    | 3.9  | 0.9 |
| Maize                                           | 9.5    | 9.2  | 1.5 |

39

40

41
